# Supplementary material for: New geographic model of care to manage the post-COVID-19 elective surgery aftershock in England: a retrospective observational study
Source: PubMed Central journal article supplement (PMC7783383; doi:10.1136/bmjopen-2020-042392), 2020-10-31
Supplement: bmjopen-2020-042392supp001.pdf [file bmjopen-2020-042392supp001.pdf]

## Appendix

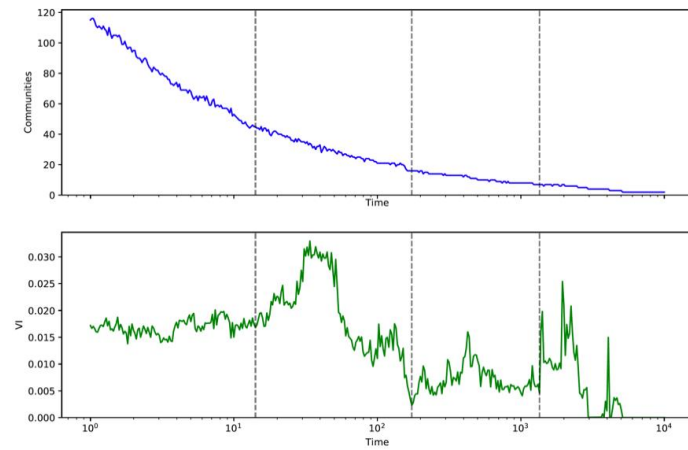

**Supplemental Figure 1:** Markov Multiscale Community Detection output showing the number of communities in the optimal network partition (top) and variation of information between partitions produced for Markov times from 1 to 10,000. Vertical lines indicate the three partitions of surgical communities selected for further review.
